# Supplementary material for: Molecular dynamics simulation of the coalescence of surfactant-laden droplets
Source: Royal Society of Chemistry journal article supplement (doi:10.1039/d3sm01046e), 2023-01-01
Supplement: d3sm01046e1.pdf [file d3sm01046e1.pdf]

## Electronic Supplementary Information for “Molecular dynamics Simulation of the Coalescence of Surfactant-Laden Droplets”

Soheil Arbabi,<sup>1</sup> Piotr Deuar,<sup>1</sup> Mateusz Denys,<sup>1</sup> Rachid  
Bennacer,<sup>2</sup> Zhizhao Che,<sup>3</sup> and Panagiotis E. Theodorakis<sup>1,\*</sup>

<sup>1</sup>*Institute of Physics, Polish Academy of Sciences,*

*Al. Lotników 32/46, 02-668 Warsaw, Poland*

<sup>2</sup>*Université Paris-Saclay, CentraleSupélec, ENS Paris-Saclay, CNRS,*

*LMPS - Laboratoire de Mécanique Paris-Saclay, 91190, Gif-sur-Yvette, France*

<sup>3</sup>*State Key Laboratory of Engines, Tianjin University, 300350 Tianjin, China*

(Dated: September 27, 2023)

### CONTENTS

|                             |    |
|-----------------------------|----|
| MASS TRANSPORT MECHANISM    | 1  |
| BRIDGE GROWTH DYNAMICS      | 13 |
| WATER FLOW VELOCITY         | 16 |
| VELOCITY OF APPROACH        | 17 |
| ASPHERICITY OF THE DROPLETS | 19 |
| MOVIES                      | 21 |
| REFERENCES                  | 22 |

### MASS TRANSPORT MECHANISM

Figures S1, S2, and S3 illustrate droplet snapshots for different concentrations in the power-law regime for droplets with C10E4, C10E8, and Silwet-L77 surfactant, respectively,

---

\* panos@ifpan.edu.pl

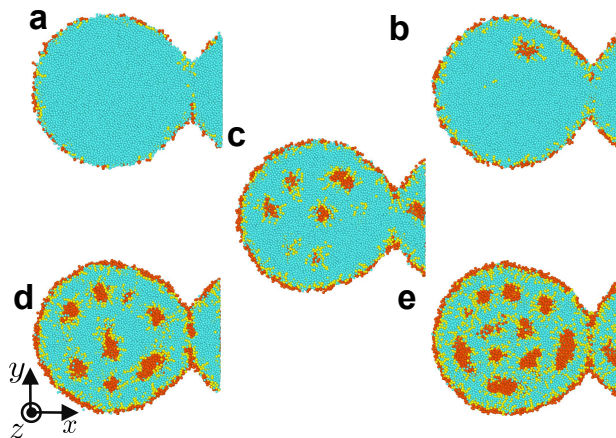

FIG. S1. Droplet interiors in the inertial regime showing the presence of new aggregates emerging during the coalescence process. Cross-sections are shown at times roughly corresponding to Fig. 1c by bridge radius for C10E4 in different concentrations, as follows: (a) 6.2 wt%,  $t_c + 45.00 \tau$ ; (b) 12.3 wt%,  $t_c + 47.50 \tau$ ; (c) 24.2 wt%,  $t_c + 48.75 \tau$ ; (d) 35.4 wt%,  $t_c + 63.75 \tau$  (e) 46.2 wt%,  $t_c + 92.5 \tau$ .

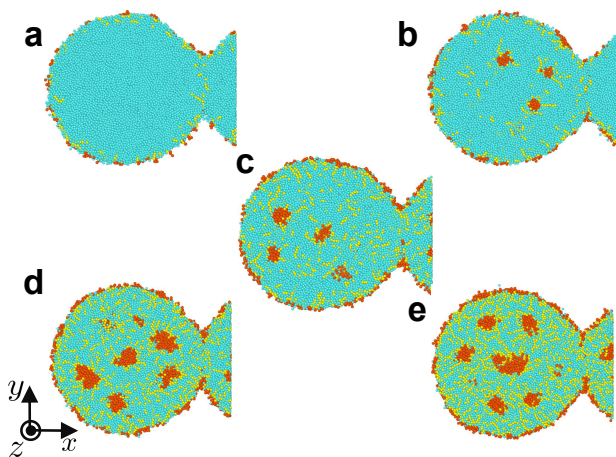

FIG. S2. Droplet interiors in the inertial regime showing the presence of new aggregates emerging during the coalescence process. Cross-sections are shown at times roughly corresponding to Fig. 1c by bridge radius for C10E8 in different concentrations, as follows: (a) 6.2 wt%,  $t_c + 50.00 \tau$ ; (b) 12.3 wt%,  $t_c + 52.50 \tau$ ; (c) 24.2 wt%,  $t_c + 70.00 \tau$ ; (d) 35.4 wt%,  $t_c + 85.00 \tau$ ; (e) 46.2 wt%,  $t_c + 92.50 \tau$ .

which complement our data in Fig. 6 of the manuscript.

The information provided in Tables S1, S2, and S3 reveals that while a significant proportion of molecules from the surface of the droplets in the contact area are transported to the surface of the resulting bridge during coalescence, some of these molecules become trapped and remain within the bulk of the formed droplet (as evidenced by the increased count in the bulk).

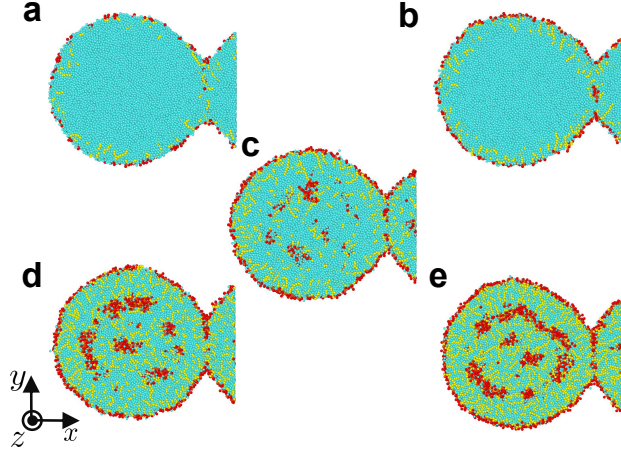

FIG. S3. Droplet interiors in the inertial regime showing the presence of new aggregates emerging during the coalescence process. Cross-sections are shown at times roughly corresponding to Fig. 1c by bridge radius for Silwet-L77 in different concentrations, as follow: (a) 7.6 wt%,  $t_c + 32.50 \tau$ ; (b) 14.8 wt%,  $t_c + 53.75 \tau$ ; (c) 28.2 wt%,  $t_c + 68.75 \tau$ ; (d) 40.3 wt%,  $t_c + 81.25 \tau$ ; (e) 51.2 wt%,  $t_c + 93.75 \tau$ .

The relative contributions from surfactant transport processes from one part of a droplet to others over short time scales  $\Delta t'$  are reported in Table S4 for three types of surfactant and the range of concentrations considered in our study. Fig. S4 shows cross-sections of the evolving droplets for C10E4, complementing also Fig. 6 of the manuscript.

TABLE S1. Number of surfactant molecules (C10E4) before pinching (“Initial snapshot”, for example, see Fig. 1a) and at the end (“Last snapshot”, for example, see Fig. 1e) of the coalescence process in the bulk and at the surface of the droplets.

| <b>Concentration (wt%):</b>            | 6.25 | 12.37 | 24.18 | 35.48 | 46.09 |
|----------------------------------------|------|-------|-------|-------|-------|
| <b>Initial snapshot (two droplets)</b> |      |       |       |       |       |
| Bulk                                   | 0    | 202   | 2184  | 4096  | 5899  |
| Surface                                | 1428 | 2656  | 3530  | 4476  | 5529  |
| <b>Last snapshot (one droplet)</b>     |      |       |       |       |       |
| Bulk                                   | 10   | 234   | 2229  | 4329  | 6167  |
| Surface                                | 1418 | 2624  | 3485  | 4243  | 5261  |

TABLE S2. Number of surfactant molecules (C10E8) before pinching (“Initial snapshot”, for example see Fig. 1a) and at the end (“Last snapshot”, for example, see Fig. 1e) of the coalescence process in the bulk and at the surface of the droplets.

| <b>Concentration (wt%):</b>            | 6.25 | 12.37 | 24.18 | 35.48 | 46.09 |
|----------------------------------------|------|-------|-------|-------|-------|
| <b>Initial snapshot (two droplets)</b> |      |       |       |       |       |
| Bulk                                   | 0    | 379   | 1429  | 2514  | 3579  |
| Surface                                | 910  | 1439  | 2207  | 2940  | 3693  |
| <b>Last snapshot (one droplet)</b>     |      |       |       |       |       |
| Bulk                                   | 11   | 400   | 1511  | 2603  | 3782  |
| Surface                                | 899  | 1418  | 2125  | 2851  | 3490  |

TABLE S3. Number of surfactant molecules (Silwet-L77) before pinching (“Initial snapshot”, for example see Fig. 1a) and at the end (“Last snapshot”, for example, see Fig. 1e) of the coalescence process in the bulk and at the surface of the droplets.

| <b>Concentration (wt%):</b>            | 7.6 | 14.8 | 28.2 | 40.3 | 51.2 |
|----------------------------------------|-----|------|------|------|------|
| <b>Initial snapshot (two droplets)</b> |     |      |      |      |      |
| Bulk                                   | 0   | 8    | 939  | 2056 | 3122 |
| Surface                                | 910 | 1810 | 2697 | 3398 | 4150 |
| <b>Last snapshot (one droplet)</b>     |     |      |      |      |      |
| Bulk                                   | 15  | 27   | 997  | 2221 | 3374 |
| Surface                                | 895 | 1791 | 2639 | 3233 | 3898 |

TABLE S4: Summary of the relative contributions from all relevant surfactant transport processes in the coalescing droplets. The table lists the relative frequency of transport from one region to another over a time interval  $\Delta t' = 1.25\tau$  as a percentage of the mean number of surfactant molecules in source regions. Data was averaged over consecutive snapshots made at  $\Delta t'$  intervals during the entire coalescence process which lasts  $\mathcal{O}(1000 - 2000)\tau$ . CAC  $\approx 7.5$  wt% for C10E4 and C10E8.

| <b>Probabilities</b>                               |                 |        |         |        |        |
|----------------------------------------------------|-----------------|--------|---------|--------|--------|
| <b>Concentration (wt%)</b>                         | C10E4 and C10E8 |        |         |        |        |
|                                                    | 6.25            | 12.37  | 24.18   | 35.48  | 46.09  |
|                                                    | Silwet-L77      |        |         |        |        |
|                                                    | 7.61            | 14.82  | 28.21   | 40.25  | 51.19  |
| <b>Remaining at bridge bulk</b>                    |                 |        |         |        |        |
| C10E4                                              | 0.8774          | 0.8098 | 0.8765  | 0.8647 | 0.8529 |
| C10E8                                              | 0.8728          | 0.8435 | 0.8693  | 0.8669 | 0.8741 |
| Silwet-L77                                         | 0.8915          | 0.8904 | 0.8814  | 0.8192 | 0.7958 |
| <b>Movement from bridge bulk to left surface</b>   |                 |        |         |        |        |
| C10E4                                              | 0.0000          | 0.0000 | 0.0005  | 0.0003 | 0.0004 |
| C10E8                                              | 0.0000          | 0.0000 | 0.0001  | 0.0002 | 0.0004 |
| Silwet-L77                                         | 0.0000          | 0.0015 | 9.1e-5  | 0.0002 | 0.0005 |
| <b>Movement from bridge bulk to left bulk</b>      |                 |        |         |        |        |
| C10E4                                              | 0.0066          | 0.0093 | 0.0648  | 0.0388 | 0.0388 |
| C10E8                                              | 0.0075          | 0.0472 | 0.0460  | 0.0419 | 0.0403 |
| Silwet-L77                                         | 0.0052          | 0.0068 | 0.0337  | 0.0392 | 0.0403 |
| <b>Movement from bridge bulk to bridge surface</b> |                 |        |         |        |        |
| C10E4                                              | 0.1092          | 0.1542 | 0.0326  | 0.0575 | 0.0685 |
| C10E8                                              | 0.1081          | 0.0642 | 0.0424  | 0.0504 | 0.0428 |
| Silwet-L77                                         | 0.0912          | 0.0882 | 0.05551 | 0.1017 | 0.1254 |
| <b>Movement from bridge bulk to right surface</b>  |                 |        |         |        |        |
| C10E4                                              | 0.0000          | 0.0008 | 9.7e-5  | 0.0004 | 0.0004 |
| C10E8                                              | 0.0000          | 0.0004 | 0.0004  | 9.7e-5 | 0.0007 |
| Silwet-L77                                         | 0.0000          | 0.0000 | 9.1e-5  | 0.0002 | 0.0008 |

*Cont. next page...*

| Concentration (wt%)                                  | C10E4 and C10E8 |         |        |         |        |
|------------------------------------------------------|-----------------|---------|--------|---------|--------|
|                                                      | 6.25            | 12.37   | 24.18  | 35.48   | 46.09  |
|                                                      | Silwet-L77      |         |        |         |        |
|                                                      | 7.61            | 14.82   | 28.21  | 40.25   | 51.19  |
| <b>Movement from bridge bulk to right bulk</b>       |                 |         |        |         |        |
| C10E4                                                | 0.0066          | 0.0257  | 0.0252 | 0.0381  | 0.0388 |
| C10E8                                                | 0.0113          | 0.0444  | 0.0413 | 0.0402  | 0.0413 |
| Silwet-L77                                           | 0.0119          | 0.0129  | 0.0290 | 0.0391  | 0.0370 |
| <b>Remaining at bridge surface</b>                   |                 |         |        |         |        |
| C10E4                                                | 0.9398          | 0.9284  | 0.9360 | 0.9244  | 0.9099 |
| C10E8                                                | 0.9284          | 0.9428  | 0.9352 | 0.9249  | 0.9251 |
| Silwet-L77                                           | 0.9307          | 0.9494  | 0.9375 | 0.9083  | 0.9065 |
| <b>Movement from bridge surface to left surface</b>  |                 |         |        |         |        |
| C10E4                                                | 0.0275          | 0.0305  | 0.0260 | 0.0237  | 0.0259 |
| C10E8                                                | 0.0330          | 0.0256  | 0.0258 | 0.0278  | 0.0253 |
| Silwet-L77                                           | 0.0315          | 0.0227  | 0.0251 | 0.02893 | 0.0254 |
| <b>Movement from bridge surface to left bulk</b>     |                 |         |        |         |        |
| C10E4                                                | 0.0001          | 0.0001  | 5.5e-5 | 0.0001  | 0.0003 |
| C10E8                                                | 0.0000          | 0.000   | 0.0001 | 0.0002  | 0.0003 |
| Silwet-L77                                           | 9.4e-5          | 0.0000  | 3.4e-5 | 0.0001  | 0.0002 |
| <b>Movement from bridge surface to bridge bulk</b>   |                 |         |        |         |        |
| C10E4                                                | 0.0042          | 0.0103  | 0.0098 | 0.0262  | 0.0373 |
| C10E8                                                | 0.0057          | 0.0087  | 0.0129 | 0.0181  | 0.0235 |
| Silwet-L77                                           | 0.0077          | 0.0045  | 0.0110 | 0.0321  | 0.0417 |
| <b>Movement from bridge surface to right surface</b> |                 |         |        |         |        |
| C10E4                                                | 0.0281          | 0.0304  | 0.0279 | 0.0251  | 0.0261 |
| C10E8                                                | 0.0326          | 0.0226  | 0.0255 | 0.0284  | 0.0252 |
| Silwet-L77                                           | 0.0298          | 0.02317 | 0.0260 | 0.0300  | 0.0257 |

*Cont. next page. . .*

| Concentration (wt%)                               | C10E4 and C10E8 |         |         |        |        |
|---------------------------------------------------|-----------------|---------|---------|--------|--------|
|                                                   | 6.25            | 12.37   | 24.18   | 35.48  | 46.09  |
|                                                   | Silwet-L77      |         |         |        |        |
|                                                   | 7.61            | 14.82   | 28.21   | 40.25  | 51.19  |
| <b>Movement from bridge surface to right bulk</b> |                 |         |         |        |        |
| C10E4                                             | 0.0000          | 2.5e-5  | 4.1e-5  | 0.0003 | 0.0002 |
| C10E8                                             | 8.7e-5          | 5.8e-5  | 0.0001  | 0.0002 | 0.0004 |
| Silwet-L77                                        | 0.0000          | 0.0000  | 3.4e-5  | 0.0002 | 0.0002 |
| <b>Remaining at left bulk</b>                     |                 |         |         |        |        |
| C10E4                                             | 0.9332          | 0.9849  | 0.9894  | 0.9877 | 0.9835 |
| C10E8                                             | 0.9074          | 0.9945  | 0.9870  | 0.9864 | 0.9803 |
| Silwet-L77                                        | 0.9171          | 0.9210  | 0.9934  | 0.9913 | 0.9825 |
| <b>Movement from left bulk to left surface</b>    |                 |         |         |        |        |
| C10E4                                             | 0.0046          | 0.0092  | 0.0052  | 0.0092 | 0.0138 |
| C10E8                                             | 0.0092          | 0.0012  | 0.0095  | 0.0111 | 0.0158 |
| Silwet-L77                                        | 0.0213          | 0.0396  | 0.0027  | 0.0055 | 0.0150 |
| <b>Movement from left bulk to bulk bridge</b>     |                 |         |         |        |        |
| C10E4                                             | 0.0000          | 0.00021 | 0.0031  | 0.0012 | 0.0011 |
| C10E8                                             | 0.0000          | 0.0019  | 0.0021  | 0.0008 | 0.0010 |
| Silwet-L77                                        | 0.0000          | 0.0015  | 0.0009  | 0.0010 | 0.0011 |
| <b>Movement from left bulk to surface bridge</b>  |                 |         |         |        |        |
| C10E4                                             | 0.0000          | 0.0000  | 9.7e-6  | 4.9e-6 | 1.1e-5 |
| C10E8                                             | 0.0000          | 0.0000  | 1.9e-5  | 9.8e-6 | 1.8e-5 |
| Silwet-L77                                        | 0.0000          | 0.0000  | 0.00000 | 6.8e-6 | 1.3e-5 |
| <b>Movement from left bulk to right surface</b>   |                 |         |         |        |        |
| C10E4                                             | 0.0000          | 0.0003  | 2.4e-5  | 3.5e-5 | 6.2e-5 |
| C10E8                                             | 0.0000          | 0.0002  | 2.4e-5  | 2.7e-5 | 2.7e-5 |
| Silwet-L77                                        | 0.0000          | 0.0024  | 3.2e-5  | 5.2e-5 | 6.7e-5 |

*Cont. next page...*

| Concentration (wt%)                                 | C10E4 and C10E8 |        |        |        |        |
|-----------------------------------------------------|-----------------|--------|--------|--------|--------|
|                                                     | 6.25            | 12.37  | 24.18  | 35.48  | 46.09  |
|                                                     | Silwet-L77      |        |        |        |        |
|                                                     | 7.61            | 14.82  | 28.21  | 40.25  | 51.19  |
| <b>Movement from left bulk to right bulk</b>        |                 |        |        |        |        |
| C10E4                                               | 0.0621          | 0.0052 | 0.0020 | 0.0018 | 0.0013 |
| C10E8                                               | 0.0833          | 0.0020 | 0.0011 | 0.0015 | 0.0026 |
| Silwet-L77                                          | 0.0615          | 0.035  | 0.0027 | 0.0020 | 0.0011 |
| <b>Remaining at left surface</b>                    |                 |        |        |        |        |
| C10E4                                               | 0.9942          | 0.9922 | 0.9912 | 0.9863 | 0.9801 |
| C10E8                                               | 0.9931          | 0.9948 | 0.9887 | 0.9859 | 0.9788 |
| Silwet-L77                                          | 0.9947          | 0.9956 | 0.9954 | 0.9926 | 0.9840 |
| <b>Movement from left surface to left bulk</b>      |                 |        |        |        |        |
| C10E4                                               | 2.1e-5          | 0.0008 | 0.0034 | 0.0094 | 0.0159 |
| C10E8                                               | 5.9e-5          | 0.0003 | 0.0067 | 0.0104 | 0.0168 |
| Silwet-L77                                          | 0.0001          | 0.0004 | 0.0010 | 0.0037 | 0.0126 |
| <b>Movement from left surface to bridge bulk</b>    |                 |        |        |        |        |
| C10E4                                               | 0.0000          | 0.0000 | 1.6e-5 | 5.8e-6 | 1.4e-5 |
| C10E8                                               | 1.2e-5          | 0.0000 | 3.4e-6 | 9.1e-7 | 1.7e-5 |
| Silwet-L77                                          | 0.0000          | 0.0000 | 0.0000 | 5.7e-7 | 7.6e-6 |
| <b>Movement from left surface to bridge surface</b> |                 |        |        |        |        |
| C10E4                                               | 0.0032          | 0.0037 | 0.0029 | 0.0017 | 0.0018 |
| C10E8                                               | 0.0045          | 0.0027 | 0.0032 | 0.0015 | 0.0014 |
| Silwet-L77                                          | 0.0033          | 0.0022 | 0.0015 | 0.0017 | 0.0019 |
| <b>Movement from left surface to right surface</b>  |                 |        |        |        |        |
| C10E4                                               | 0.0025          | 0.0031 | 0.0029 | 0.0024 | 0.0019 |
| C10E8                                               | 0.0022          | 0.0020 | 0.0012 | 0.0020 | 0.0028 |
| Silwet-L77                                          | 0.0017          | 0.0015 | 0.0019 | 0.0017 | 0.0012 |

*Cont. next page. . .*



| Concentration (wt%)                               | C10E4 and C10E8 |        |        |         |        |
|---------------------------------------------------|-----------------|--------|--------|---------|--------|
|                                                   | 6.25            | 12.37  | 24.18  | 35.48   | 46.09  |
|                                                   | Silwet-L77      |        |        |         |        |
|                                                   | 7.61            | 14.82  | 28.21  | 40.25   | 51.19  |
| <b>Movement from left surface to right bulk</b>   |                 |        |        |         |        |
| C10E4                                             | 0.0000          | 2.8e-5 | 1.1e-5 | 3.2e-5  | 6.5e-5 |
| C10E8                                             | 1.2e-5          | 3.0e-5 | 2.4e-5 | 3.1e-5  | 1.7e-5 |
| Silwet-L77                                        | 0.0000          | 2.0e-5 | 1.0e-5 | 3.4e-5  | 5.2e-5 |
| <b>Remaining at right bulk</b>                    |                 |        |        |         |        |
| C10E4                                             | 0.9251          | 0.9831 | 0.9900 | 0.9875  | 0.9831 |
| C10E8                                             | 0.9103          | 0.9926 | 0.9871 | 0.9859  | 0.9808 |
| Silwet-L77                                        | 0.9493          | 0.9155 | 0.9937 | 0.9912  | 0.9833 |
| <b>Movement from right bulk to right surface</b>  |                 |        |        |         |        |
| C10E4                                             | 0.0000          | 0.0096 | 0.0068 | 0.0094  | 0.0142 |
| C10E8                                             | 0.0373          | 0.0033 | 0.0097 | 0.0116  | 0.0153 |
| Silwet-L77                                        | 0.0059          | 0.0428 | 0.0025 | 0.0056  | 0.0143 |
| <b>Movement from right bulk to bulk bridge</b>    |                 |        |        |         |        |
| C10E4                                             | 0.0000          | 0.0018 | 0.0011 | 0.0011  | 0.0011 |
| C10E8                                             | 0.0000          | 0.0018 | 0.0019 | 0.0007  | 0.0010 |
| Silwet-L77                                        | 0.0000          | 0.0015 | 0.0008 | 0.0010  | 0.0010 |
| <b>Movement from right bulk to surface bridge</b> |                 |        |        |         |        |
| C10E4                                             | 0.0000          | 0.0000 | 2.4e-6 | 1.1e-5  | 1.4e-5 |
| C10E8                                             | 0.0000          | 0.0000 | 2.8e-5 | 7.9e-6  | 1.9e-5 |
| Silwet-L77                                        | 0.0000          | 0.0000 | 2.7e-6 | 6.85e-6 | 2.0e-5 |
| <b>Movement from right bulk to left surface</b>   |                 |        |        |         |        |
| C10E4                                             | 0.0000          | 0.0001 | 1.9e-5 | 2.7e-5  | 5.0e-5 |
| C10E8                                             | 0.0014          | 0.0001 | 1.9e-5 | 2.9e-5  | 2.7e-5 |
| Silwet-L77                                        | 0.0000          | 0.0018 | 2.4e-5 | 5.4e-5  | 7.3e-5 |

*Cont. next page...*

| Concentration (wt%)                                  | C10E4 and C10E8 |        |        |        |        |
|------------------------------------------------------|-----------------|--------|--------|--------|--------|
|                                                      | 6.25            | 12.37  | 24.18  | 35.48  | 46.09  |
|                                                      | Silwet-L77      |        |        |        |        |
|                                                      | 7.61            | 14.82  | 28.21  | 40.25  | 51.19  |
| <b>Movement from right bulk to left bulk</b>         |                 |        |        |        |        |
| C10E4                                                | 0.0748          | 0.0051 | 0.0019 | 0.0018 | 0.0013 |
| C10E8                                                | 0.0508          | 0.0019 | 0.0011 | 0.0015 | 0.0026 |
| Silwet-L77                                           | 0.0447          | 0.0381 | 0.002  | 0.0020 | 0.0011 |
| <b>Remaining at right surface</b>                    |                 |        |        |        |        |
| C10E4                                                | 0.9940          | 0.9923 | 0.9898 | 0.9859 | 0.9795 |
| C10E8                                                | 0.9932          | 0.9946 | 0.9884 | 0.9856 | 0.9793 |
| Silwet-L77                                           | 0.9948          | 0.9956 | 0.9954 | 0.9926 | 0.9845 |
| <b>Movement from right surface to right bulk</b>     |                 |        |        |        |        |
| C10E4                                                | 0.0000          | 0.0008 | 0.0045 | 0.0096 | 0.0165 |
| C10E8                                                | 0.0002          | 0.0010 | 0.0069 | 0.0107 | 0.0163 |
| Silwet-L77                                           | 8.10e-5         | 0.0004 | 0.0009 | 0.0037 | 0.0121 |
| <b>Movement from right surface to bridge bulk</b>    |                 |        |        |        |        |
| C10E4                                                | 0.0000          | 0.0000 | 4.7e-6 | 9.9e-6 | 7.7e-6 |
| C10E8                                                | 0.0000          | 0.0000 | 1.4e-5 | 3.6e-6 | 1.9e-5 |
| Silwet-L77                                           | 0.0000          | 0.0000 | 1.0e-6 | 3.4e-6 | 1.3e-5 |
| <b>Movement from right surface to bridge surface</b> |                 |        |        |        |        |
| C10E4                                                | 0.0033          | 0.0036 | 0.0031 | 0.0019 | 0.0018 |
| C10E8                                                | 0.0043          | 0.0023 | 0.0032 | 0.0015 | 0.0013 |
| Silwet-L77                                           | 0.0032          | 0.0022 | 0.0015 | 0.0018 | 0.0019 |
| <b>Movement from right surface to left surface</b>   |                 |        |        |        |        |
| C10E4                                                | 0.0025          | 0.0031 | 0.0024 | 0.0024 | 0.0019 |
| C10E8                                                | 0.0021          | 0.0019 | 0.0013 | 0.0020 | 0.0028 |
| Silwet-L77                                           | 0.0017          | 0.0016 | 0.0019 | 0.0016 | 0.0012 |

*Cont. next page...*

| Concentration (wt%)                             | C10E4 and C10E8 |        |        |        |        |
|-------------------------------------------------|-----------------|--------|--------|--------|--------|
|                                                 | 6.25            | 12.37  | 24.18  | 35.48  | 46.09  |
|                                                 | Silwet-L77      |        |        |        |        |
|                                                 | 7.61            | 14.82  | 28.21  | 40.25  | 51.19  |
| <b>Movement from right surface to left bulk</b> |                 |        |        |        |        |
| C10E4                                           | 0.0000          | 2.2e-5 | 1.4e-5 | 3.3e-5 | 7.5e-5 |
| C10E8                                           | 1.1e-5          | 3.6e-5 | 1.7e-5 | 2.5e-5 | 3.4e-5 |
| Silwet-L77                                      | 0.0000          | 3.0e-5 | 9.2e-6 | 3.2e-5 | 4.9e-5 |

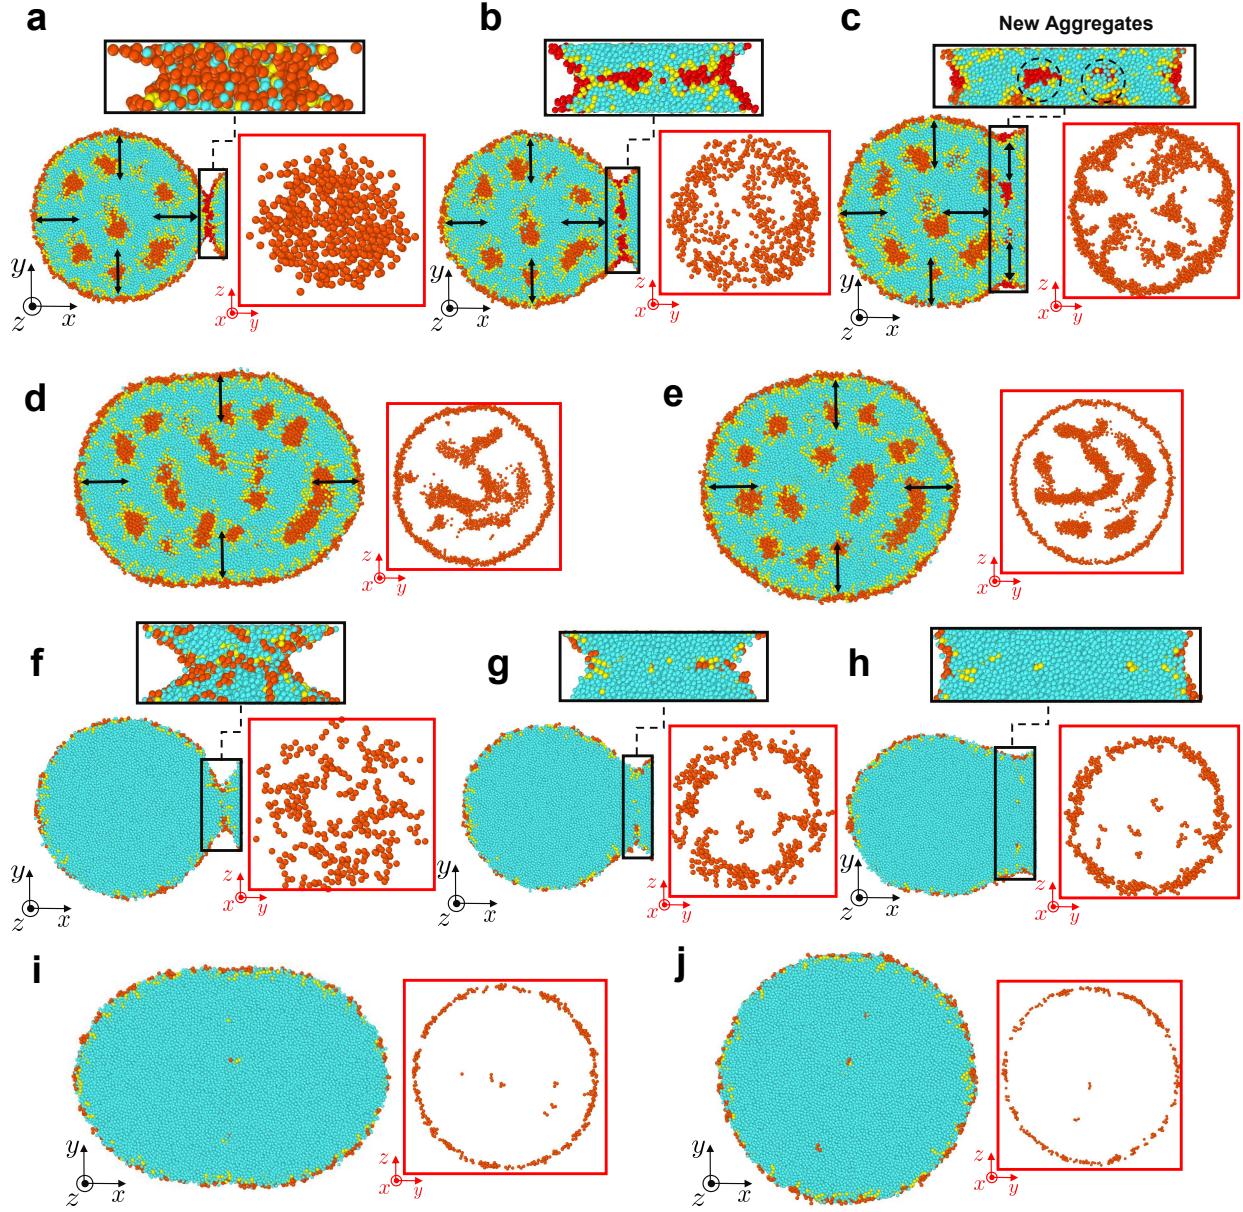

FIG. S4. Mass transport mechanism of surfactant (C10E4) during the coalescence process, for concentrations above (upper panels) and below (lower panels) CAC. The length of the arrows reflects the probabilities associated with surfactant transport to the different droplet areas as reported in Table S4. Above the CAC (a–e, 35.48 wt%) snapshots were obtained at times (a)  $t_c + 32.5 \tau$ , (b)  $t_c + 76.25 \tau$ , (c)  $t_c + 233.75 \tau$ , (d)  $t_c + 517.50 \tau$ , (e)  $t_c + 1358.75 \tau$ , while below the CAC (f–j, 6.25 wt%) times shown are (f)  $t_c + 20 \tau$ , (g)  $t_c + 55 \tau$ , (h)  $t_c + 100 \tau$ , (i)  $t_c + 197.5 \tau$ , (j)  $t_c + 283.75 \tau$ . Different stages of the coalescence process are shown: soon after the end of the thermal regime (a, f), the development of the bridge and the formation of new aggregates (b, g) or surfactant monomers remaining in the bridge region (c, h), and the full development of the bridge (d, i) towards the final equilibrium state (e, j). Magnified views of the bridge region and its cross-section (showing only surfactant hydrophobic beads in the bridge region, red) are shown above and to the right of the snapshots, respectively.

## BRIDGE GROWTH DYNAMICS

The average velocity ( $b/t$ ) of bridge growth is reported in Table S5. It shows that adding surfactant reduces the average velocity in all cases. However, we see interesting behaviour for Silwet-L77, which is the fastest among surfactant-laden droplets in the lowest concentration but in higher concentrations Silwet-L77 is the slowest one. This behaviour also is confirmed when we compare later the velocities of approach. In low concentrations (below CAC), Silwet-L77 makes less aggregates and they have low density, which helps the droplets to coalesce faster. However, when it comes to higher concentrations, Silwet-L77 aggregates are more in quantity and surface tension is the smallest in Silwet-L77. Both of these properties make coalescence slower in higher concentrations for Silwet-L77.

In Fig. S5, the bridge growth rate of pure water and in the highest concentration (46.2 wt%) of C10E4 are plotted. In both curves the values of the thermal length scale ( $l_{\text{Thermal}} = (k_B T / \gamma)^{1/4} R_0^{1/2}$ ) [1] are marked using horizontal lines which is  $l_w = 4.0 \sigma$  for pure water and  $l_s = 5 \sigma$  for surfactant-laden droplets. It is seen that this is an excellent match to the early non-changing bridge radius. This crossover takes more time and is more pronounced in case of surfactant-laden drops, presumably due to the reduction of surface tension due to presence of surfactant. We also report on the bridge growth dynamics for all concentrations in the case of C10E8 (Fig. S6a) and Silwet-L77 (Fig. S6b), in complement to Fig. 9 of the main manuscript.

TABLE S5. Average velocity of bridge growth in units  $\sigma/\tau$  from  $t_c$  until the full development of the bridge (for example, see snapshots of Fig. 1d of the main manuscript). <sup>a</sup>

| Concentration (wt%)                    | C10E4 and C10E8 |        |            |        |        |
|----------------------------------------|-----------------|--------|------------|--------|--------|
|                                        | 6.25            | 12.37  | 24.18      | 35.48  | 46.09  |
|                                        |                 |        | Silwet-L77 |        |        |
|                                        | 7.61            | 14.82  | 28.21      | 40.25  | 51.19  |
| C10E4                                  | 0.2849          | 0.2204 | 0.1878     | 0.1605 | 0.1047 |
| C10E8                                  | 0.2794          | 0.2319 | 0.1871     | 0.1530 | 0.1115 |
| Silwet-L77                             | 0.2912          | 0.2029 | 0.1550     | 0.1034 | 0.0655 |
| CAC(C10E4 and C10E8) $\simeq$ 7.5) wt% |                 |        |            |        |        |
| CAC(Silwet-L77) $\simeq$ 16.23 wt%     |                 |        |            |        |        |

<sup>a</sup> For pure water droplets in the viscous regime (result from simulation):  $0.3675 \sigma/\tau$

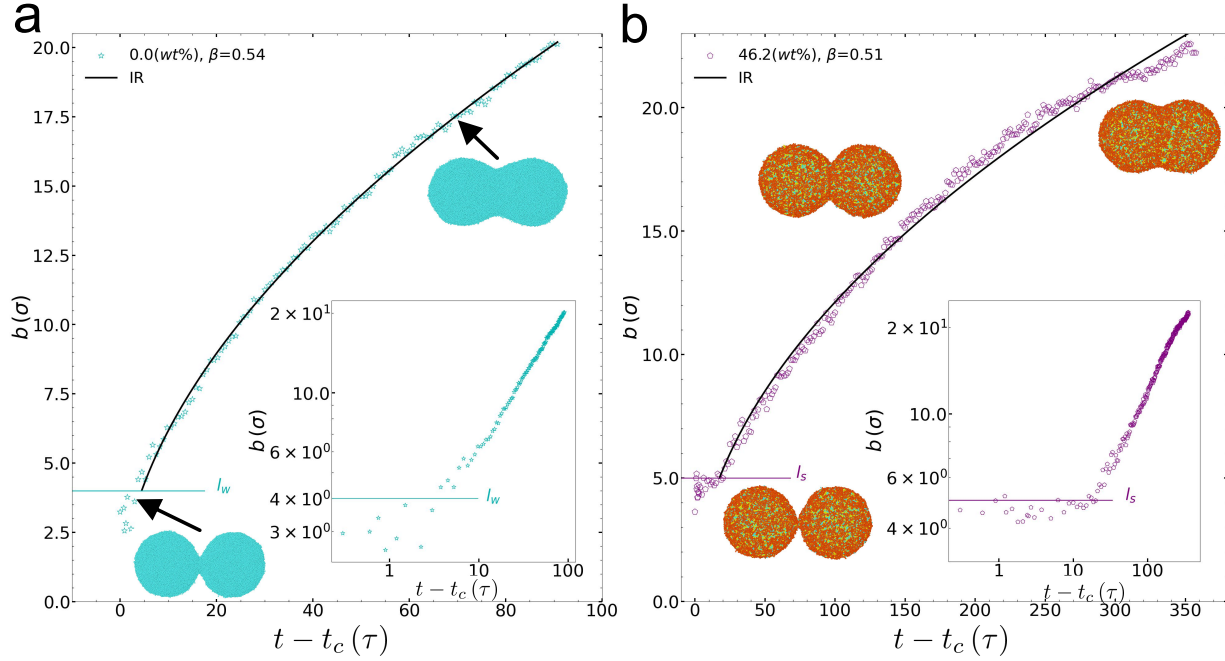

FIG. S5. a) Bridge growth rate in the case of pure water droplets. When the bridge radius,  $b$ , reaches the thermal length scale for pure water ( $l_w = 4 \sigma$ ), hydrodynamics effect play the main role and a fast transition between thermal and inertial regimes occurs. b) Bridge growth rate of surfactant-laden droplets (C10E4, 46.2 wt%). When the bridge radius reaches the thermal length scale for surfactant-laden droplets ( $l_s = 5 \sigma$ ), the transition occurs as well, but subsequent growth is slower than in pure water.

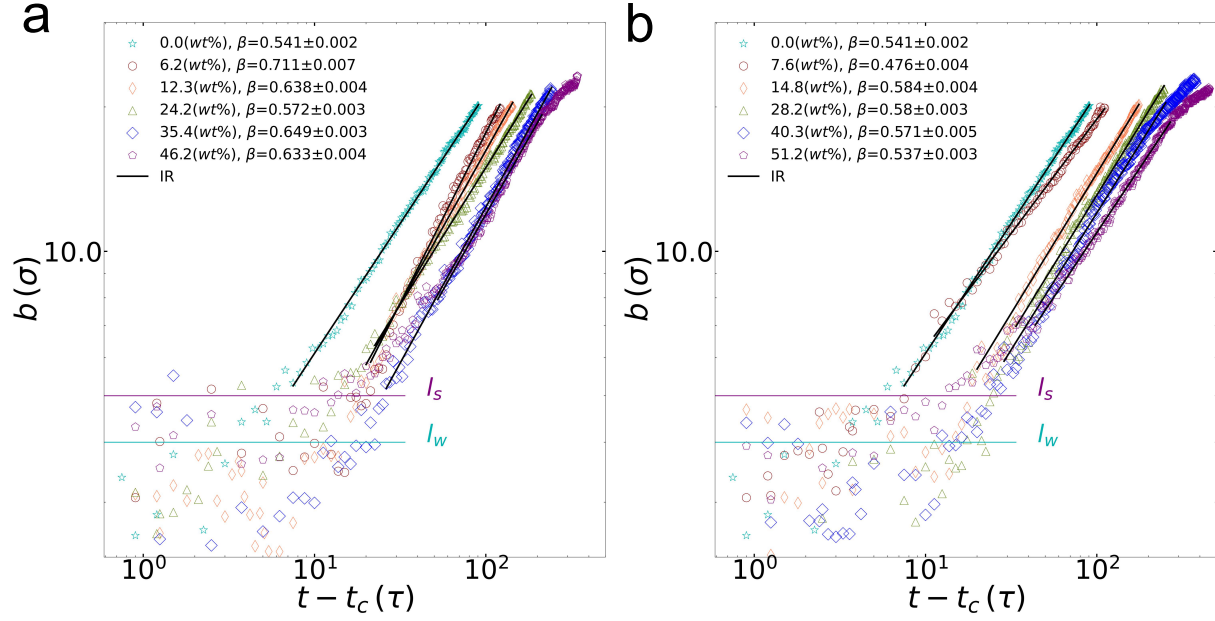

FIG. S6. Bridge growth rate in the case of a) C10E8 and b) Silwet-L77 for different concentrations in wt%, as indicated. Increasing the surfactant concentration makes the bridge growth slower and transition between thermal and inertial regime takes more time. Power-law fits  $\sim t^\beta$  are shown, labeled 'IR'.  $l_s$  is the thermal length in the case of surfactant-laden droplets above CAC, while  $l_w$  is the thermal length in the case of pure water droplets. Notation like in Fig. 9 of the main manuscript, with  $b$  being the bridge radius and  $t_c$  the time of the establishment of the permanent contact between the droplets.

## WATER FLOW VELOCITY

TABLE S6. Average velocity of water flow in the direction,  $X$ , of the droplets approach for pure water droplets in units  $\sigma/\tau$ . The velocities are separately averaged for inward and outward flowing grids (colors in Fig. 8 of the manuscript) to show the relative importance of the difference between inflow and outflow.

| $t(\tau)$                    | $t_c + [0, 7.5]$    | $t_c + [8.25, 27.75]$ | $t_c + [28.5, 89.25]$ |
|------------------------------|---------------------|-----------------------|-----------------------|
| $b(\sigma)$                  | $3.2 < b < 5.4$     | $5.58 < b < 10.90$    | $11.00 < b < 20.11$   |
| Toward bridge (System)       | $0.1946 \pm 0.0016$ | $0.1926 \pm 0.0013$   | $0.2001 \pm 0.0008$   |
| Away from bridge (System)    | $0.1943 \pm 0.0018$ | $0.1808 \pm 0.0019$   | $0.1660 \pm 0.0011$   |
| Toward centre (In bridge)    | $0.298 \pm 0.016$   | $0.257 \pm 0.009$     | $0.202 \pm 0.004$     |
| Away from centre (In bridge) | $0.27 \pm 0.03$     | $0.193 \pm 0.010$     | $0.183 \pm 0.004$     |

TABLE S7. Data for C10E4 (46.2 wt%) droplets in the same convention as Fig. S6.

| $t(\tau)$                    | $t_c + [0, 12.5]$   | $t_c + [13.75, 81.25]$ | $t_c + [82.5, 360]$ |
|------------------------------|---------------------|------------------------|---------------------|
| $b(\sigma)$                  | $3.72 < b < 4.55$   | $4.87 < b < 10.33$     | $11.00 < b < 22.00$ |
| Toward bridge (System)       | $0.2634 \pm 0.0021$ | $0.2684 \pm 0.0016$    | $0.2710 \pm 0.0008$ |
| Away from bridge (System)    | $0.265 \pm 0.004$   | $0.2642 \pm 0.0012$    | $0.2593 \pm 0.0008$ |
| Toward centre (In bridge)    | $0.445 \pm 0.024$   | $0.336 \pm 0.010$      | $0.277 \pm 0.003$   |
| Away from centre (In bridge) | $0.40 \pm 0.05$     | $0.325 \pm 0.011$      | $0.272 \pm 0.003$   |

TABLE S8. Data for Silwet-L77 droplets (51.2 wt%) in the same convention as Fig. S6.

| $t(\tau)$                    | $t_c + [0, 12.5]$   | $t_c + [13.75, 86.25]$ | $t_c + [87.5, 598.75]$ |
|------------------------------|---------------------|------------------------|------------------------|
| $b(\sigma)$                  | $3.50 < b < 4.50$   | $5.00 < b < 9.94$      | $10.00 < b < 23.37$    |
| Toward bridge (System)       | $0.2625 \pm 0.0027$ | $0.2703 \pm 0.0014$    | $0.2705 \pm 0.0005$    |
| Away from bridge (System)    | $0.2685 \pm 0.0030$ | $0.2614 \pm 0.0014$    | $0.2616 \pm 0.0005$    |
| Toward centre (In bridge)    | $0.45 \pm 0.04$     | $0.341 \pm 0.010$      | $0.2756 \pm 0.0017$    |
| Away from centre (In bridge) | $0.37 \pm 0.03$     | $0.334 \pm 0.010$      | $0.2699 \pm 0.0027$    |



## VELOCITY OF APPROACH

In the main manuscript, the velocity of approach of C10E4 for different concentrations is reported, using the length of system in the  $X$  direction and its derivative with time. Here, we present the analogous data for C10E8 (Figure S7a) and Silwet-L77 (Figure S7b). The dynamics are similar to C10E4, as explained in the main manuscript. We also compare all three types of surfactants for the lowest (Figure S8a) and highest concentrations (Figure S8b). The data show that Silwet-L77 has the smallest maximum absolute velocity both in low and high concentrations. The surface tension of Silwet-L77 is around 20.7 mN/m [2], while the values for C10E4 and C10E8 are about 27 mN/m and 36 mN/m, respectively [3, 4].

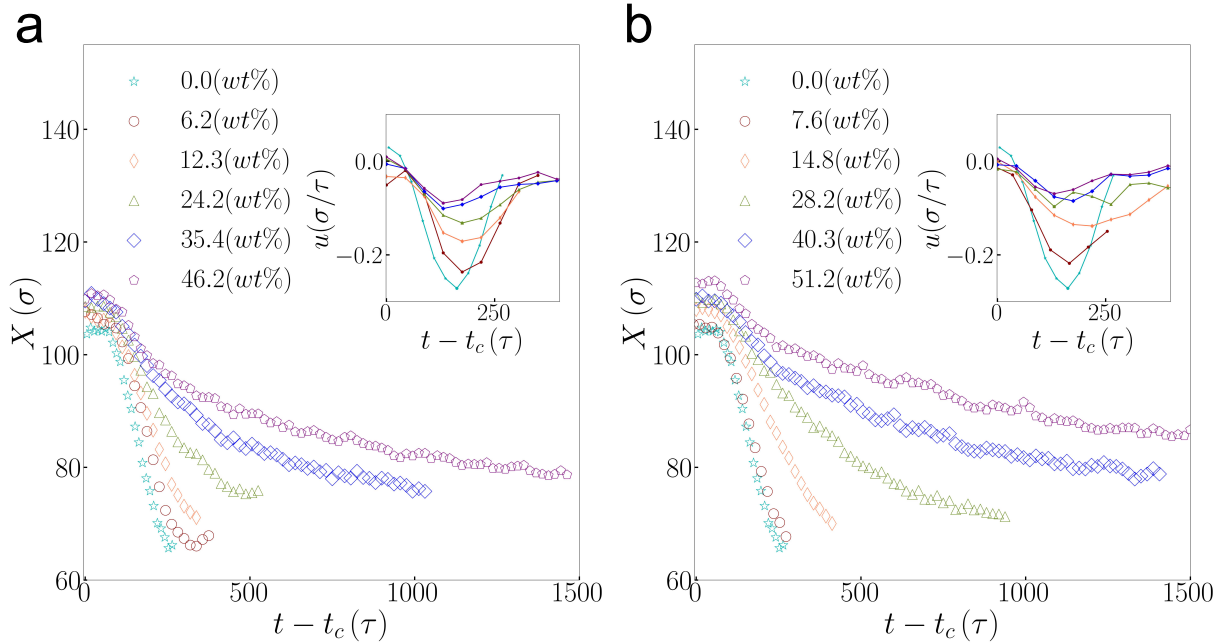

FIG. S7. System length  $X$  for droplets for different concentrations of a) C10E8 and b) Silwet-L77. Insets show the instantaneous velocity of approach  $u = dX/dt$ .

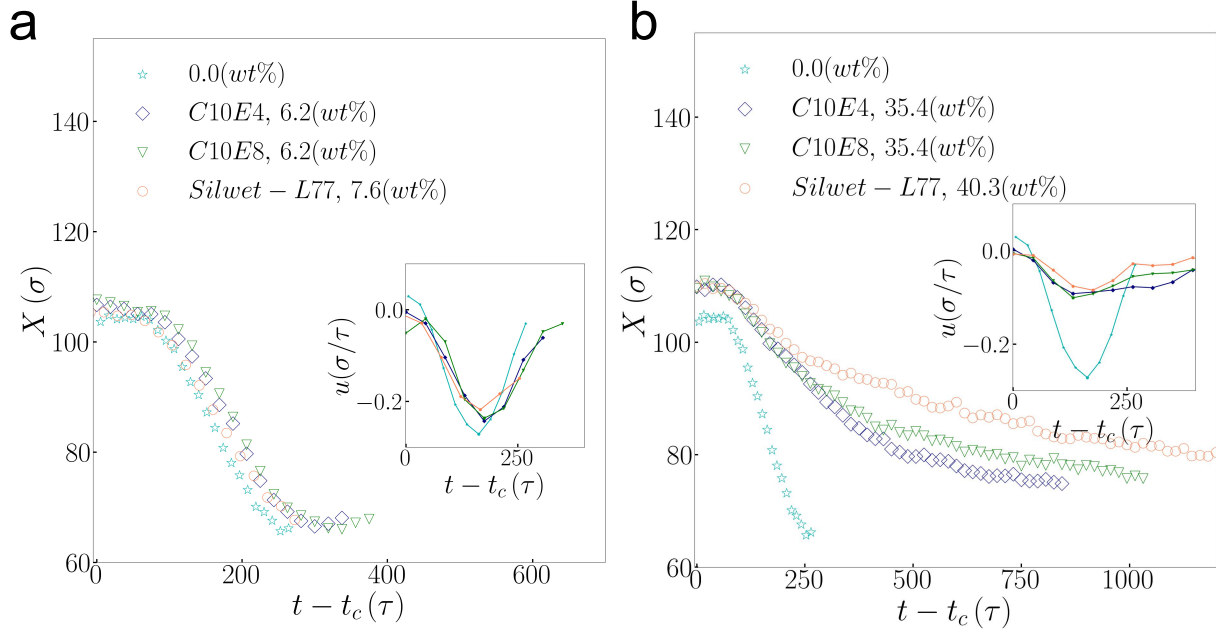

FIG. S8. comparison of velocity of approach in all three types of surfactants in a) low and b) high concentrations. When it comes to the maximum velocity, Silwet-L77 has the smallest.

## ASPHERICITY OF THE DROPLETS

To characterise the structural features, we calculated the gyration tensor (Eq. 1) where  $N$  is the number of particles,  $x_i, y_i, z_i$  are coordinates of the particles and  $x_{cm}, y_{cm}, z_{cm}$  give the centre of mass of the system. Eigenvalues of the gyration tensor (Eq. 1) are found and sorted ( $\lambda_1 \geq \lambda_2 \geq \lambda_3$ ) to obtain the gyration tensor trace (Eq. 2), and calculate asphericity (Eq. 3) — which is zero for a perfect spherical symmetry — for each snapshot. Figure S9 illustrates the asphericity of C10E4, C10E8, and Silwet-L77 laden droplets during the coalescence for different concentrations. Adding more surfactant causes significant changes in structural features. Higher concentration of surfactant leads to delayed creation of a single equilibrated sphere ( $a_s = 0$ ). Moreover, comparison between all three types of surfactants in different concentrations are plotted in Figs S10a and b.

$$\frac{1}{N} \begin{pmatrix} \Sigma_i(x_i - x_{cm})^2 & \Sigma_i(x_i - x_{cm})\Sigma_i(y_i - y_{cm}) & \Sigma_i(x_i - x_{cm})\Sigma_i(z_i - z_{cm}) \\ \Sigma_i(x_i - x_{cm})\Sigma_i(y_i - y_{cm}) & \Sigma_i(y_i - y_{cm})^2 & \Sigma_i(y_i - y_{cm})\Sigma_i(z_i - z_{cm}) \\ \Sigma_i(x_i - x_{cm})\Sigma_i(z_i - z_{cm}) & \Sigma_i(y_i - y_{cm})\Sigma_i(z_i - z_{cm}) & \Sigma_i(z_i - z_{cm})^2 \end{pmatrix} \quad (1)$$

$$\text{Tr}S = \lambda_1 + \lambda_2 + \lambda_3 = R_g^2 \quad (2)$$

$$a_s = \lambda_1 - \frac{1}{2}(\lambda_2 + \lambda_3) \quad (3)$$

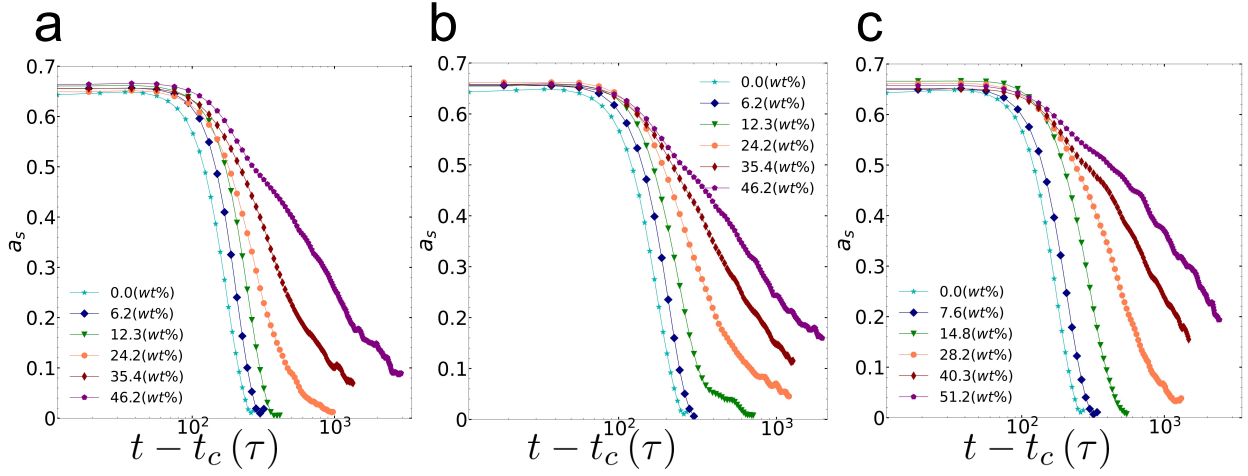

FIG. S9. Comparison of Asphericity ( $a_s$ ) during the coalescence process of surfactant types a) C10E4, b) C10E8, and c) Silwet-L77.

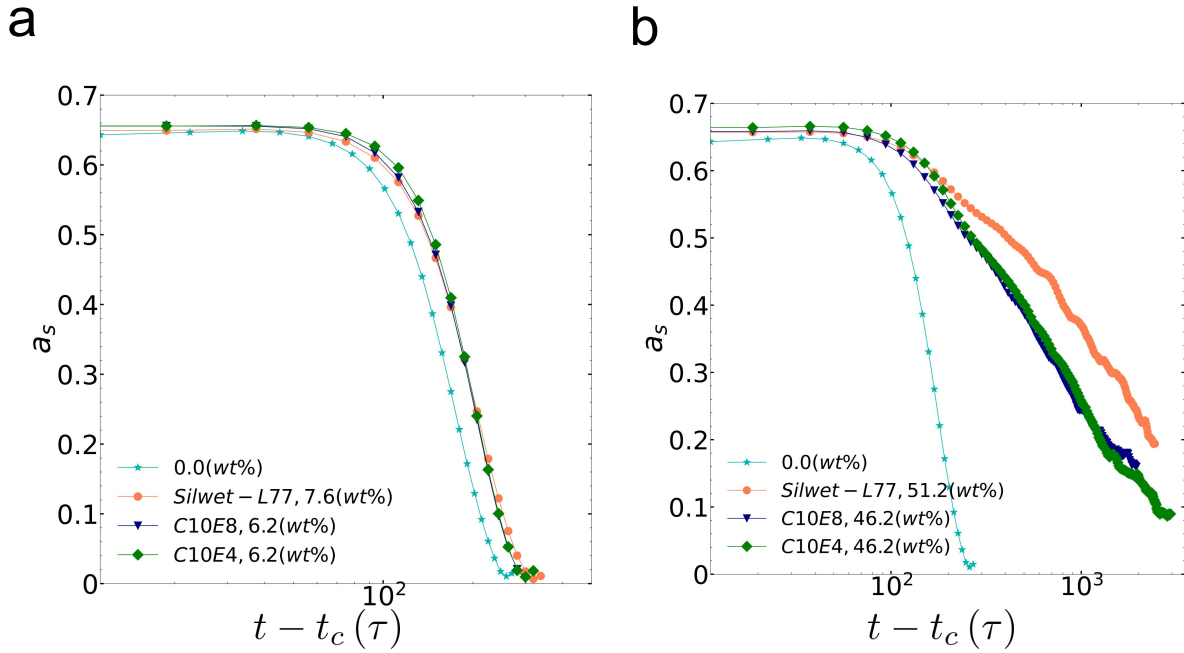

FIG. S10. comparison of Asphericity ( $a_s$ ) in all three types of surfactants in a) low and b) high concentrations.

## MOVIES

- File `M1_coalescence.mp4`: shows the coalescence of two surfactant-laden droplets (C10E4, 46.2 wt%)
- File `M2_pinching.mp4`: shows the pinching at the initial approach of the droplets (C10E4, 46.2 wt%)
- File `M3_bridge_zoom.mp4`: shows the bridge area of C10E4 (46.2 wt%,  $t(\tau) = t_c + [0, 150]$ ) from the pinching point to a developed bridge. On the right, water beads and on the left surfactant beads during the coalescence are shown. It is evident that coalescence starts with surfactant beads (mainly the hydro phobic ones) and water joins much later.
- File `M4_mass_transport.mp4`: Here the inside of surfactant-laden droplets of C10E4 (46.2 wt%) are shown during the coalescence. The key points are surfactant movements inside the bridge (from bulk to surface) and the creation of new aggregates inside the bridge.

- 
- [1] S. Perumanath, M. K. Borg, M. V. Chubynsky, J. E. Sprittles, and J. M. Reese, *Phys. Rev. Lett.* **122**, 104501 (2019).
  - [2] X. Tang, J. Dong, and X. Li, *J. Colloid Interface Sci.* **325**, 223 (2008).
  - [3] Y.-C. Lee, H.-S. Liu, S.-Y. Lin, H.-F. Huang, Y.-Y. Wang, and L.-W. Chou, *J. Chin. Inst. Chem. Eng.* **39**, 75 (2008).
  - [4] D. Anghel, S. Saito, A. Băran, A. Iovescu, and M. Cornițescu, *Colloid Polym. Sci* **285**, 771 (2007).
